# Supplementary material
Source: bioRxiv or medRxiv preprint supplement (https://medrxiv.org/highwire/filestream/94584/field_highwire_adjunct_files/2/2020.08.24.20180653-3.pdf)
Supplement: Supplementary file [file 2020.08.24.20180653-3.pdf]

## Supplementary material

### Supplementary material C: Missing data by variable

Table C1: Data items missing from study set

| Category                        | Missing values<br>(out of 200) |                           |    |
|---------------------------------|--------------------------------|---------------------------|----|
| Gender                          | 0                              | Previous Stroke           | 0* |
| Diagnosis                       | 9                              | Neurologic Comorb         | 0* |
| Age                             | 0                              | Renal Comorb              | 0* |
| BMI                             | 1                              | Hepatic Comorb            | 0* |
| Surgery Side                    | 0                              | Gastro Comorb             | 0* |
| Joint                           | 0                              | Bleeding Comorb           | 0* |
| ASA                             | 2                              | Hematologic Comorb        | 0* |
| Use Of Walking Aids             | 24                             | Musculoskeletal<br>Comorb | 0* |
| Preop Walking<br>Distance       | 98                             | Psychiatric Comorb        | 0* |
| Caregiver Assistance<br>At Home | 0                              | Neuropathic Pain Meds     | 0* |
| Preoperative METs               | 115                            | Simple Analgaesics        | 0* |
| Cardiovascular<br>Comorb        | 0*                             | Preop Anemia              | 0  |
| Respiratory Comorb              | 0*                             | Opioid Use                | 0  |
| Diabetes                        | 0*                             | Discharge Destination     | 0  |
| Endocrine                       | 0*                             | Length of stay            | 0  |

*\*assumed no if no data contained in record*

Table C2: Missing data from model sets

| Adapted model | Scoring tool                                                                                             |                                                                                                    | Regression model                                                                                         |                                                                                                     |
|---------------|----------------------------------------------------------------------------------------------------------|----------------------------------------------------------------------------------------------------|----------------------------------------------------------------------------------------------------------|-----------------------------------------------------------------------------------------------------|
|               | Missing data                                                                                             | Action                                                                                             | Missing data                                                                                             | Action                                                                                              |
| Winemaker     |                                                                                                          |                                                                                                    | <ul style="list-style-type: none"> <li>• ASA: 2/200</li> </ul>                                           | <ul style="list-style-type: none"> <li>• Patients excluded</li> </ul>                               |
| Oldmeadow     | <ul style="list-style-type: none"> <li>• Gait aid: 24/200</li> <li>• Walking distance: 75/176</li> </ul> | <ul style="list-style-type: none"> <li>• Patients excluded</li> <li>• Allocated score 1</li> </ul> | <ul style="list-style-type: none"> <li>• Gait aid: 24/200</li> <li>• Walking distance: 75/176</li> </ul> | <ul style="list-style-type: none"> <li>• Patients excluded</li> <li>• Category 'missing'</li> </ul> |
| Gabriel       | <ul style="list-style-type: none"> <li>• Preop METs: 115/200</li> </ul>                                  | <ul style="list-style-type: none"> <li>• Patients excluded</li> </ul>                              | <ul style="list-style-type: none"> <li>• Preop METs: 115/200</li> <li>• BMI: 1/200</li> </ul>            | <ul style="list-style-type: none"> <li>• Category 'missing'</li> <li>• Patient excluded</li> </ul>  |
